# Supplementary material for: Gas Sensing by Bacterial H-NOX Proteins: An MD Study
Source: PubMed Central journal article supplement (PMC7356049; doi:10.3390/molecules25122882), 2020-06-23
Supplement: molecules-25-02882-s001.pdf [file molecules-25-02882-s001.pdf]

## Supplementary Materials for

# Gas-sensing by bacterial H-NOX proteins: an MD study

Ahmed M. Rozza,<sup>1,2</sup> Dóra K. Menyhárd<sup>3,\*</sup> and Julianna Oláh<sup>1,\*</sup>

<sup>1</sup> Department of Inorganic and Analytical Chemistry, Budapest University of Technology, Budapest Szent Gellért tér 4. H-1111 ahmed.rozza89@azhar.edu.eg

<sup>2</sup> Department of Biotechnology, Faculty of Agriculture, Al-Azhar University, Cairo 11651, Egypt

<sup>3</sup> Laboratory of Structural Chemistry and Biology & MTA-ELTE Protein Modelling Research Group, Institute of Chemistry, Eötvös Loránd University, Pázmány Péter sétány 1/A, 1117 Budapest, Hungary

\* Correspondence: [dmenyhard@chem.elte.hu](mailto:dmenyhard@chem.elte.hu) and [olahjucsi@gmail.com](mailto:olahjucsi@gmail.com)

- I. Ligand parameters used in the molecular dynamics simulations
- II. **Table S1.** Overall RMSD values of backbone atoms calculated for the various trajectories
- III. **Table S2.** Identified binding cavities (with residue numbers) and selected properties (overall occupancy in % of the last 300 ns of the whole trajectory, average distance of the centroid of the gas molecule from the heme iron, average length of a molecule being trapped, number of in-and-out events) in the case of NO, O<sub>2</sub> and CO diffusion to *Ns* H-NOX. The most fluctuating amino acid residues of each pocket are highlighted in bold.
- IV. **Table S3.** Identified binding cavities (with residue numbers) and selected properties (overall occupancy in % of the last 300 ns of the whole trajectory, average distance of the centroid of the gas molecule from the heme iron, average length of a molecule being trapped, number of in-and-out events) in the case of NO, O<sub>2</sub> and CO diffusion to *Ka* H-NOX. The most fluctuating amino acid residues of each pocket are highlighted in bold.
- V. **Table S4.** Identified binding cavities (with residue numbers) and selected properties (overall occupancy in % of the last 300 ns of the whole trajectory, average distance of the centroid of the gas molecule from the heme iron, average length of a molecule being trapped, number of in-and-out events) in the case of NO, O<sub>2</sub> and CO diffusion to *Ns* H-NOX. The most fluctuating amino acid residues of each pocket are highlighted in bold.
- VI. **Table S5.** Calculated gas and protein concentrations and cell size in the MD simulations
- VII. **Figure S1.** Blocking of Tunnel 3 in *Ns* H-NOX by the hydrogen bond between TRP74 and heme group.
- VIII. **Figure S2.** Blocking of Tunnel 1 in *Cs* H-NOX by the hydrogen bond triad among TYR140, TRP9 and ASN74; steric hindrance of the tunnel by the hydrophobic interaction between two bulky residues (TRP9 and TRP67).
- IX. **Figure S3.** Blocking of Tunnel 2 in *Ka* H-NOX by (a) the cation- $\pi$  interaction between PHE45 and ARG 137 and (b) the steric hindrance caused by MET1 and MET 139.

## Ligand parameters used in the molecular dynamics simulations

### NO-ligand <sup>[44]</sup>

#### Bonded parameters:

[ atoms ]

| ;id | at type | res nr | residu name | at name | charge |
|-----|---------|--------|-------------|---------|--------|
| 1   | LP      | 1      | NO          | DU      | 0.595  |
| 2   | NO      | 1      | NO          | N       | -0.250 |
| 3   | ON      | 1      | NO          | O       | -0.345 |

[ bonds ]

| ;i | j | funct | length | force.c. |
|----|---|-------|--------|----------|
| 2  | 3 | 1     | 0.1151 | 960228   |

;Vsite from

|       | funct | a       |
|-------|-------|---------|
| 1 2 3 | 1     | 0.53333 |

#### Non-bonded Parameters:

| at type | Sigma (nm)    | epsilon (kJ/mol) |
|---------|---------------|------------------|
| NO      | 0.32786885250 | 0.8368           |
| ON      | 0.33606557380 | 0.66944          |
| LP      | 0             | 0                |

### CO-ligand <sup>[32]</sup>

#### Bonded parameters:

[ atoms ]

| ;id | at type | res nr | residu name | at name | cg nr | charge |
|-----|---------|--------|-------------|---------|-------|--------|
| 1   | LP      | 1      | CO          | DU      | 1     | 1.600  |
| 2   | CM      | 1      | CO          | C       | 1     | -0.750 |
| 3   | OM      | 1      | CO          | O       | 1     | -0.850 |

[ bonds ]

| ;i | j | funct | length | force.c. |
|----|---|-------|--------|----------|
| 2  | 3 | 1     | 0.1128 | 1115000  |

;Vsite from

|       | funct | a      |
|-------|-------|--------|
| 1 2 3 | 2     | 0.5000 |

#### Non-bonded Parameters:

| at type | Sigma (nm)     | epsilon (kJ/mol) |
|---------|----------------|------------------|
| CM      | 0.383000000000 | 0.10963          |
| OM      | 0.312000000000 | 0.66567          |
| LP      | 0              | 0                |

**O<sub>2</sub>-ligand** <sup>[30]</sup>**Bonded parameters:**

[ atoms ]

```
;id  at.type  res.nr  residue  at.name  cg.nr  charge
1    LPX     1     OXY     LP      1     0.228
2    OX      1     OXY     OX1     1     -0.114
3    OX      1     OXY     OX2     1     -0.114
```

[ bonds ]

```
;i  j    funct  length  force.c.
2  3     2     0.121  1.4559e+07
```

```
;Vsite from      funct  a
1  2  3           1     0.5000
```

**Non-bonded Parameters:**

| at type | Sigma (nm)     | epsilon (kJ/mol) |
|---------|----------------|------------------|
| OX      | 0.205000000000 | 0.6656744 ;      |
| LPX     | 0.300578000000 | 0.43046 ;        |

**Table S1.** Overall RMSD values of backbone atoms calculated for the various trajectories

| H-NOXs               | NO        |           |           | CO        |           |           | O <sub>2</sub> |           |           | Apo       |           |           |
|----------------------|-----------|-----------|-----------|-----------|-----------|-----------|----------------|-----------|-----------|-----------|-----------|-----------|
|                      | <i>Ns</i> | <i>Ka</i> | <i>Cs</i> | <i>Ns</i> | <i>Ka</i> | <i>Cs</i> | <i>Ns</i>      | <i>Ka</i> | <i>Cs</i> | <i>Ns</i> | <i>Ka</i> | <i>Cs</i> |
| Ave.<br>RMSD<br>[nm] | 0.116     | 0.155     | 0.279     | 0.109     | 0.137     | 0.132     | 0.128          | 0.146     | 0.297     | 0.143     | 0.164     | 0.240     |

**Table S2.** Identified binding cavities (with residue numbers) and selected properties (overall occupancy in % of the last 300 ns of the whole trajectory, average distance of the centroid of the gas molecule from the heme iron, average length of a molecule being trapped, number of in-and-out events) in the case of NO, O<sub>2</sub> and CO diffusion to Ns H-NOX. The most fluctuating amino acid residues of each pocket are highlighted in bold.

| Binding Pockets                                                                                                                                                                                                                                                                                                                                                                                                                                                                                                                                                                                                                                                                                                                                                                    | NO                                 | O <sub>2</sub>                     | CO                                |
|------------------------------------------------------------------------------------------------------------------------------------------------------------------------------------------------------------------------------------------------------------------------------------------------------------------------------------------------------------------------------------------------------------------------------------------------------------------------------------------------------------------------------------------------------------------------------------------------------------------------------------------------------------------------------------------------------------------------------------------------------------------------------------|------------------------------------|------------------------------------|-----------------------------------|
| <p>➤ <b>Distal pocket:</b> [<b>MET1</b>, VAL5, TRP74, <b>MET144</b>, heme]</p> <p>- average distance of centroid of gas molecule---FE<br/>4.0 Å</p> <p>- average length of being trapped<br/>920.2ps</p> <p>- number of <i>in-and-out</i> event<br/>323</p>                                                                                                                                                                                                                                                                                                                                                                                                                                                                                                                        | 99.3%<br>4.0 Å<br>920.2ps<br>323   | 92.8%<br>3.95 Å<br>189.8ps<br>1469 | 91.13%<br>4.3 Å<br>609.0ps<br>463 |
| <p>➤ <b>Proximal pocket:</b> [<b>LEU104</b>, HIS105, <b>VAL108</b>, GLY109, LEU115, PRO118, heme]</p> <p>- average distance of centroid of gas molecule---NE2 of HIS105<br/>4.94 Å</p> <p>- average length of being trapped<br/>212.2ps</p> <p>- number of <i>in-and-out</i> event<br/>677</p>                                                                                                                                                                                                                                                                                                                                                                                                                                                                                     | 47.90%<br>4.94 Å<br>212.2ps<br>677 | 28.6%<br>4.5Å<br>40.1ps<br>2144    | 0.0%<br>-<br>-<br>-               |
| <p>➤ <b>Accessible-binding sites in the diffusion tunnels:</b></p> <p><b>Tunnel 1 (Xe2 &amp; Xe3):</b></p> <p><b>*Xe2:</b> [VAL5, <b>ILE9</b>, THR48, LEU67, PHE70, <b>LEU141</b>]</p> <p>- average length of being trapped<br/>62.0ps</p> <p>- number of transfer events <i>in-and-out</i><br/>4335</p> <p><b>*Xe3:</b> [ILE9, MET12, ILE13, VAL52, <b>LEU66</b>, PHE70]</p> <p>- average length of being trapped<br/>185.9ps</p> <p>- number of transfer events <i>in-and-out</i><br/>1488</p>                                                                                                                                                                                                                                                                                   | 89.6%<br>62.0ps<br>4335            | 50.7%<br>21.2ps<br>7155            | 65.2%<br>63.8ps<br>3162           |
| <p><b>Tunnel 2 (side-propionate):</b><br/>[<b>MET1</b>, THR48, <b>TYR49</b>, LEU67, <b>ARG138</b>, CYS139, GLY140, <b>LEU141</b>]</p> <p>- average length of being trapped<br/>144.0ps</p> <p>- number of transfer events <i>in-and-out</i><br/>2001</p>                                                                                                                                                                                                                                                                                                                                                                                                                                                                                                                           | 96.0%<br>144.0ps<br>2001           | 40.4%<br>21.4ps<br>5690            | 24.0%<br>16.9ps<br>4423           |
| <p><b>Tunnel 3 (Side-entrance):</b><br/>[LEU4, TYR83, LEU86, SER111, PHE112]</p> <p>- average length of being trapped<br/>17.2ps</p> <p>- number of transfer events <i>in-and-out</i><br/>4857</p>                                                                                                                                                                                                                                                                                                                                                                                                                                                                                                                                                                                 | 27.8%<br>17.2ps<br>4857            | 18.0%<br>19.3ps<br>2801            | 16.6%<br>17.6ps<br>2928           |
| <p>➤ <b>Surface pockets (SP):</b></p> <p><b>*Distal surface pocket (DSP) :</b><br/>[GLN10, TRP22, LYS26, LEU31, <b>ILE34</b>, <b>ASP35</b>, <b>PHE36</b>, PHE37]</p> <p>- average length of being trapped<br/>3913ps</p> <p>- number of transfer events <i>in-and-out</i><br/>57</p> <p><b>*Proximal surface pocket 1 (P1SP) (αF, αE):</b><br/>[<b>LEU86</b>, SER89, ALA90, ASN100, HIS104, <b>ARG107</b>]</p> <p>- average length of being trapped<br/>139.5ps</p> <p>- number of transfer events <i>in-and-out</i><br/>1437</p> <p><b>*Proximal surface pocket 2 (P2SP) (αF, β-sheet):</b><br/>[PRO95, MET98, <b>GLU99</b>, CYS122, <b>HIS124</b>, MET130]</p> <p>- average length of being trapped<br/>882.7ps</p> <p>- number of transfer events <i>in-and-out</i><br/>337</p> | 75.8%<br>3913ps<br>57              | 38.3%<br>304.0ps<br>378            | 34.2%<br>1858.3ps<br>57           |
|                                                                                                                                                                                                                                                                                                                                                                                                                                                                                                                                                                                                                                                                                                                                                                                    | 66.8%<br>139.5ps<br>1437           | 55.7%<br>131.0ps<br>1276           | 45.4%<br>102.45ps<br>1370         |
|                                                                                                                                                                                                                                                                                                                                                                                                                                                                                                                                                                                                                                                                                                                                                                                    | 99.25%<br>882.7ps<br>337           | 9.0%<br>86.1ps<br>314              | 12.8%<br>302.4ps<br>130           |

**Table S3.** Identified binding cavities (with residue numbers) and selected properties (overall occupancy in % of the last 300 ns of the whole trajectory, average distance of the centroid of the gas molecule from the heme iron, average length of a molecule being trapped, number of in-and-out events) in the case of NO, O<sub>2</sub> and CO diffusion to *Ka* H-NOX. The most fluctuating amino acid residues of each pocket are highlighted in bold.

| <b>Binding Pockets</b>                                                                                                                                                                                                                                                                                                                                                                                                                                                | <b>NO</b>                         | <b>O<sub>2</sub></b>              | <b>← CO</b>                      | <b>Formatted Table</b> |
|-----------------------------------------------------------------------------------------------------------------------------------------------------------------------------------------------------------------------------------------------------------------------------------------------------------------------------------------------------------------------------------------------------------------------------------------------------------------------|-----------------------------------|-----------------------------------|----------------------------------|------------------------|
| <p>➤ <b>Distal pocket:</b> [<b>MET1</b>, <b>ILE5</b>, PHE74, PHE142, MET139, heme]</p> <p>- average distance of centroid of gas molecule---FE</p> <p>- average length of being trapped</p> <p>- number of transfer events <i>in-and-out</i></p>                                                                                                                                                                                                                       | 86.1%<br>5.3 Å<br>116.0ps<br>2258 | 42.2%<br>5.1 Å<br>59.0ps<br>2255  | 13.5%<br>5.6 Å<br>45.0ps<br>922  |                        |
| <p>➤ <b>Proximal:</b> [HIS104, GLU106, VAL107, ARG108, ALA114, <b>GLU115</b>, LEU116, heme]</p> <p>- average distance of centroid of gas molecule---NE2 of HIS104</p> <p>- average length of being trapped</p> <p>- number of transfer events <i>in-and-out</i></p>                                                                                                                                                                                                   | 99.95%<br>5.3 Å<br>7940 ps<br>37  | 75.1%<br>5.3 Å<br>284.5 ps<br>791 | 99.44%<br>5.3 Å<br>2277ps<br>118 |                        |
| <p>➤ <b>Accessible-binding sites in the diffusion tunnels:</b></p> <p><b>Tunnel 1 (Xe2 &amp; Xe3):</b></p> <p><b>*XE2:</b> [ILE5, PHE9, MET48, LEU52, LEU67, <b>TYR70</b>, MET139]</p> <p>- average length of being trapped</p> <p>- number of transfer events <i>In-and-out</i></p> <p><b>*XE3:</b> [PHE9, LEU12, VAL13, PHE17, <b>LEU66</b>, THR69, <b>TYR70</b>]</p> <p>- average length of being trapped</p> <p>- number of transfer events <i>in-and-out</i></p> | 87.64%<br>84.3ps<br>3165          | 26.4%<br>19.2ps<br>4363           | 55.65%<br>75.0ps<br>2282         |                        |
| <p><b>Tunnel 2 (Side-propionate):</b></p> <p>[MET1, PHE45, MET48, LEU49, LEU67, ARG137, MET139]</p> <p>- average length of being trapped</p> <p>- number of transfer events <i>in-and-out</i></p>                                                                                                                                                                                                                                                                     | 29.2%<br>13.0ps<br>6844           | 10.7%<br>8.0ps<br>4237            | 16.67%<br>9.5ps<br>5387          |                        |
| <p><b>Tunnel 3 (Side-entrance):</b></p> <p>[<b>ILE4</b>, VAL77, ILE78, SER81, <b>TYR82</b>, VAL107, TYR111, heme part (CMA, CBB and CMB)]</p> <p>- average length of being trapped</p> <p>- number of transfer events <i>in-and-out</i></p>                                                                                                                                                                                                                           | 86.6%<br>73ps<br>3542             | 18.2%<br>34ps<br>1571             | 22.0%<br>55ps<br>1178            |                        |
| <p>➤ <b>Buried pockets/cavities (BP):</b></p> <p><b>BP1:</b> [LEU96, PHE119, <b>MET131</b>, TYR133, HIS140, GLY143, LEU144, MET147, <b>PHE174</b>]</p> <p>- average length of being trapped</p> <p>- number of transfer events <i>in-and-out</i></p>                                                                                                                                                                                                                  | 94.8%<br>184.0ps<br>1555          | 21.3%<br>17.3ps<br>3902           | 13.4%<br>69.0ps<br>597           |                        |

**Table S4.** Identified binding cavities (with residue numbers) and selected properties (overall occupancy in % of the last 300 ns of the whole trajectory, average distance of the centroid of the gas molecule from the heme iron, average length of a molecule being trapped, number of in-and-out events) in the case of NO, O<sub>2</sub> and CO diffusion to Cs H-NOX. The most fluctuating amino acid residues of each pocket are highlighted in bold.

| <b>Binding Pockets</b>                                                                                                                                                       | <b>NO</b>                | <b>O<sub>2</sub></b>     | <b>CO</b>      |
|------------------------------------------------------------------------------------------------------------------------------------------------------------------------------|--------------------------|--------------------------|----------------|
| ➤ <b>Distal pocket:</b> [MET1, ILE5, PHE78, TYR140, heme]<br>- average distance of centroid of gas molecule--FE<br>- average length of being trapped in distal pocket        | 64.8%<br>4.3 Å<br>27.5ps | 44.4%<br>3.6 Å<br>86.6ps | 0.0%<br>-<br>- |
| ➤ <b>Proximal pocket:</b><br>[PHE94, MET98, VAL101, HIS102, LEU105, THR106, PRO115, LEU117, heme]<br>-average distance of centroid of gas molecule--NE2 of HIS102            | 3.3%<br>5.1Å             | 56.9%<br>4.7Å            | 0.4 %<br>??    |
| ➤ <b>Accessible-binding sites in the diffusion tunnels:</b><br><b>Tunnel 2 (Side-propionate):</b><br>[MET1, TRP9, ASP45, VAL48, ARG49, TRP67, ARG135, MET137]                | 82.7%                    | 22.2%                    | 75.1%          |
| ➤ <b>Surface pockets (SP):</b><br><b>*Proximal surface pocket 1 (P1SP) (<math>\alpha</math> F, <math>\beta</math>-sheet):</b><br>[PHE86, ARG89, PHE94, MET97, MET98, VAL101] | 10.2%                    | 12.8%                    | 84.4%          |
| ➤ <b>Buried pockets/cavities (BP):</b><br><b>BP1:</b> [MET98, LEU117, MET129, GLU130, TYR131, PHE141, LEU142, ILE145, LEU172, VAL174]                                        | 0.2%                     | 69.5%                    | 0.0%           |
| <b>BP2:</b> [LEU95, MET98, MET129, PHE141, LEU144, ILE145]                                                                                                                   | 5.8%                     | 28.5%                    | 99.3%          |
| <b>BP3:</b> [VAL6, TRP9, ILE10, LEU13, VAL48, ILE51, PHE52, TRP67]                                                                                                           | 39.5%                    | 4.0%                     | 0.0%           |

**Table S5.** Calculated gas and protein concentrations and cell size in the MD simulations

| <b>H-NOX</b> | <b>[Gas]</b>              | <b>[Protein]</b>            | <b>Unit cell volume</b>     |
|--------------|---------------------------|-----------------------------|-----------------------------|
| <i>Ns</i>    | 0.176 mol/dm <sup>3</sup> | 0.00440 mol/dm <sup>3</sup> | 3.77545E-22 dm <sup>3</sup> |
| <i>Ka</i>    | 0.173 mol/dm <sup>3</sup> | 0.00431 mol/dm <sup>3</sup> | 3.84863E-22 dm <sup>3</sup> |
| <i>Cs</i>    | 0.133 mol/dm <sup>3</sup> | 0.00332 mol/dm <sup>3</sup> | 5.00349E-22 dm <sup>3</sup> |

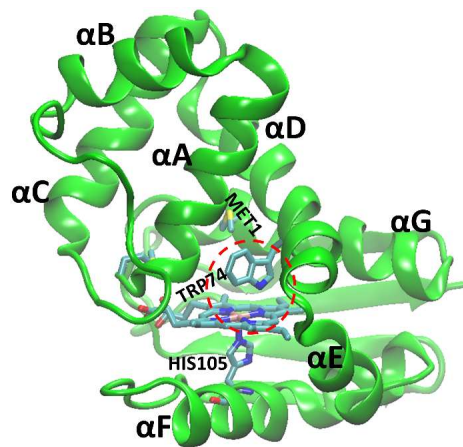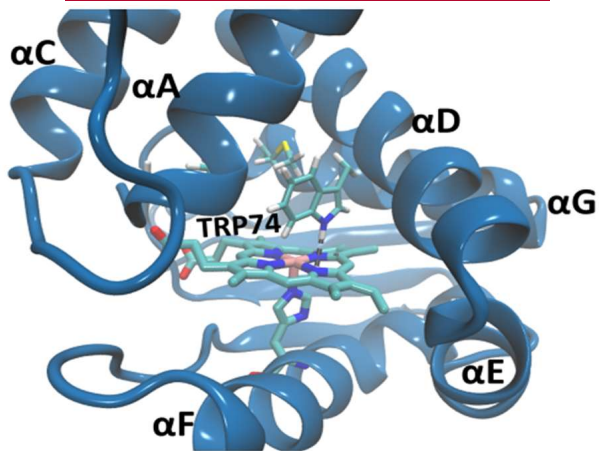

Figure S1. Blocking of Tunnel 3 in *Ns* H-NOX by the hydrogen bond between TRP74 and heme group.

Formatted: Font: Italic

Formatted: Font: Bold

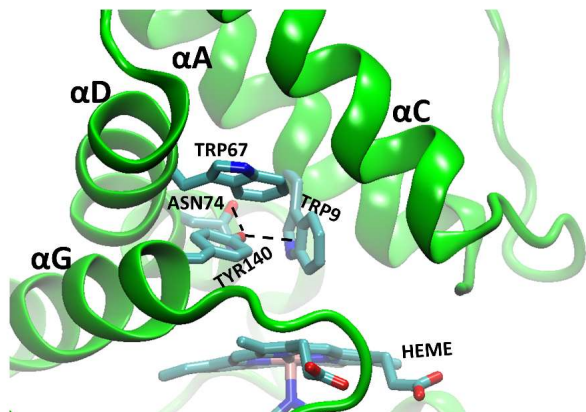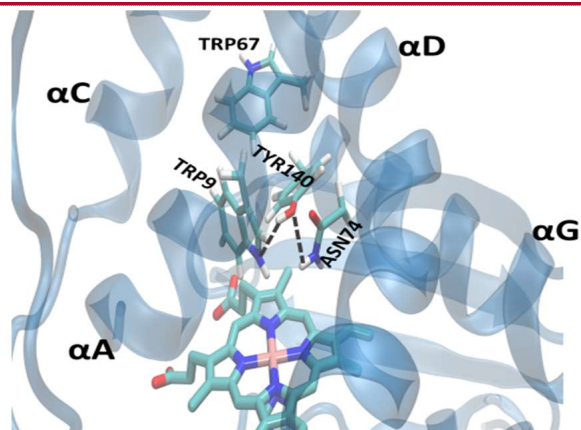

**Figure S2.** Blocking of Tunnel 1 in Cs H-NOX by the hydrogen bond triad among TYR140, TRP9 and ASN74; steric hindrance of the tunnel by the hydrophobic interaction between two bulky residues (TRP9 and TRP67).



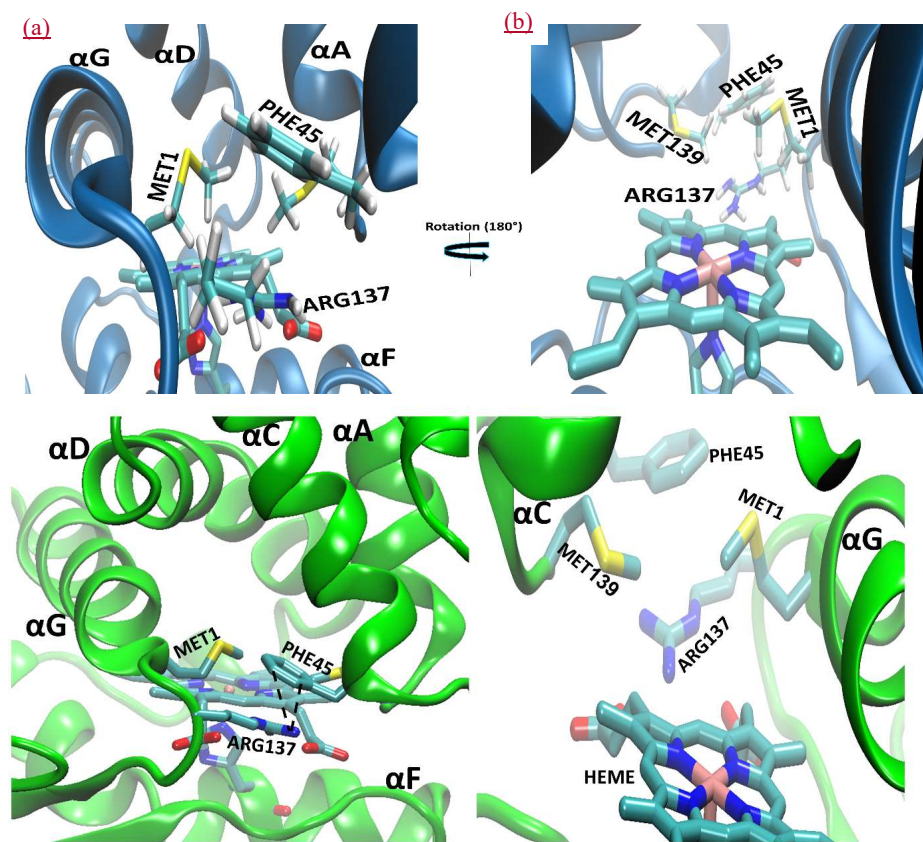

**Figure S3.** Blocking of Tunnel 2 in *Ka* H-NOX by (a) the cation- $\pi$  interaction between PHE45 and ARG 137 and (b) the steric hindrance caused by MET1 and MET-139.

**Formatted:** Font: (Default) Palatino Linotype, (Asian) Times New Roman, 10 pt, Bold, Font color: Black
